# Supplementary material for: Hydrogeochemical controls on aquifers of northwestern Illinois’ Driftless Area, USA
Source: Springer Nature journal article supplement (doi:10.1007/s12665-019-8271-7), 2019-04-25
Supplement: MOESM1 [file 16678526]

**SUPPLEMENTAL MATERIALS**

***2018 Driftless Area Supplemental Materials***

**Hydrogeochemical controls on aquifers of northwestern Illinois’ Driftless Area, USA**

Samuel V. Panno1, Walton R. Kelly2 and Elizabeth L. Baranski3

**Abstract**

Groundwater in the Driftless Area of northwestern Illinois is a very hard Ca-Mg-bicarbonate-type water that reflects the dolomite aquifer material in this karst region. Groundwater in shallow aquifers has a short residence time and is susceptible to surface-borne contaminants. Deeper aquifers have distinct chemistry indicating longer flowpaths, most clearly indicated by low tritium values and elevated potassium and fluoride concentrations.

Thirty water samples were collected from springs from across Jo Daviess County in northwestern Illinois between 2015 and 2016. The groundwater samples collected from what were initially identified as *springs* were found to be of two types: 1) Natural springs that are stratigraphically controlled and discharging from crevices and bedding planes, espeically where the underlying Galena Dolomite or overlying Silurian dolomite aquifer intersect the Maquoketa Shale; and 2) Abandoned flowing-artesian wells, often with no identifiable well casing at the surface, that had been mistaken for springs. Background concentrations of eight water quality parameters were calculated to determine pre-settlement and present-day background thresholds. The background concentrations, overall chemical compositions, tritium concentrations, and F/Cl and K/Cl ratios were used to characterize and group groundwater within the study area. The results of this investigation, combined with recent work by the authors (Panno et al. 2017) were used to determine the geologic, hydrogeologic and geochemical controls on springs in this part of the Driftless Area. The results of this investigation revealed the susceptibility of the Galena Dolomite and Silurian dolomite aquifers to surface-borne contaminants. In addition, this work has developed a means, using ion ratios and spring location relative to bedrock geology to identify discharge from abandoned wells.

Table E-1. Median concentrations (n = 8) from spring sample data from Maas (2010). Grab samples were collected roughly monthly between May and October, 2009. McPhillips is the same spring as sample number 46 in Table 1.

| Spring Name | Temp ºC | pH | EC | DO | Ca | Mg | Na | K |
| --- | --- | --- | --- | --- | --- | --- | --- | --- |
|  |  |  | uS/cm | % | mg/L | mg/L | mg/L | mg/L |
| Hicks | 10.4 | 6.81 | 691 | 7.8 | 67.7 | 39.2 | 7.13 | 0.26 |
|  |  |  |  |  |  |  |  |  |
| Heller | 10.55 | 6.565 | 838.5 | 60.5 | 81.6 | 46.3 | 5.89 | 0.22 |
|  |  |  |  |  |  |  |  |  |
| Cora | 10.5 | 6.49 | 808 | 60 | 82.0 | 45.1 | 9.71 | 0.44 |
|  |  |  |  |  |  |  |  |  |
| Sargent | 11.9 | 6.51 | 698 | 50 | 69.9 | 35.8 | 6.00 | 0.14 |
|  |  |  |  |  |  |  |  |  |
| McPhillips | 10.2 | 6.59 | 1015 | 58.6 | 97.2 | 54.9 | 9.96 | 1.36 |
|  |  |  |  |  |  |  |  |  |
| Holesinger | 13.3 | 6.465 | 785.5 | 58.85 | 78.3 | 39.1 | 9.93 | 3.25 |
|  |  |  |  |  |  |  |  |  |
|  |  |  |  |  |  |  |  |  |
| Spring Name | Si | Fe | Mn | Alkalinity | F | Cl | NO3 -N | SO4 |
|  | mg/L | mg/L | mg/L | as CaCO3 | mg/L | mg/L | mg/L | mg/L |
| Hicks | 5.08 | 0.030 | 0.012 | 282 | 0.329 | 6.6 | 0.3 | 29.9 |
|  |  |  |  |  |  |  |  |  |
| Heller | 6.42 | 0.025 | 0.002 | 305 | 0.171 | 23.9 | 11.6 | 9.1 |
|  |  |  |  |  |  |  |  |  |
| Cora | 6.51 | 0.016 | 0.003 | 299 | 0.169 | 16.0 | 11.8 | 18.5 |
|  |  |  |  |  |  |  |  |  |
| Sargent | 4.98 | 0.019 | 0.003 | 229 | 0.301 | 17.0 | 11.9 | 15.2 |
|  |  |  |  |  |  |  |  |  |
| McPhillips | 5.30 | 0.022 | 0.004 | 325 | 0.151 | 23.2 | 27.3 | 22.3 |
|  |  |  |  |  |  |  |  |  |
| Holesinger | 5.73 | 0.018 | 0.002 | 248 | 0.244 | 16.6 | 15.4 | 26.6 |

Table E-2. Well sample chemical data from Panno et al. (2017). Groundwater samples collected from 11 shallow wells across Jo Daviess County in July 2014.

| Site no. | Well depth (m) | Year drilled | Water source (formation) | Casing length (m) | Temp. (°C) | pH | EC (µS/cm) |
| --- | --- | --- | --- | --- | --- | --- | --- |
| Well 1 | 33.5 | 1996 | Platteville | 19.5 | 11.5 | 6.64 | 567 |
| Well 2 | 35.4 | 1991 | Platteville | 25.9 | 11.4 | 6.58 | 675 |
| Well 3 | 38.1 | 2009 | Galena. | 25.0 | 11.7 | 6.65 | 663 |
| Well 4 | 36.6 | 2010 | Galena | 25.0 | 12.2 | 6.67 | 673 |
| Well 5 | 48.8 | ND | Galena | 29.6 | 13.6 | 6.57 | 805 |
| Well 6 | 33.5 | 2004 | Galena | 19.5 | 12.4 | 6.61 | 663 |
| Well 7 | 33.5 | 2003 | Galena | 13.7 | 11.7 | 6.73 | 520 |
| Well 8 | 35.0 | 2004 | Galena | 26.8 | 17.9 | 6.67 | 664 |
| Well 9 | 30.5 | 2006 | Galena | 25.9 | 11.7 | 6.63 | 743 |
| Well 10 | 38.7 | 1994 | Galena | 30.5 | 11.7 | 6.56 | 773 |
| G-well | 21.3 | ND | Galena | 21.3 | 12.3 | 6.57 | 1,223 |
|  |  |  |  |  |  |  |  |
| Site no. | ORP (mV) | DO (mg/L) | Ba (mg/L) | Ca (mg/L) | Fe (mg/L) | K (mg/L) | Li (mg/L) |
| Well 1 | 163 | <0.1 | 0.14 | 69.8 | 0.118 | 1.28 | <0.11 |
| Well 2 | 275 | 0.4 | 0.03 | 80.1 | <0.024 | 1.14 | <0.11 |
| Well 3 | 333 | 3.5 | 0.05 | 74.1 | <0.024 | 2.20 | <0.11 |
| Well 4 | 357 | 2.8 | 0.03 | 81.6 | <0.024 | 0.85 | <0.11 |
| Well 5 | 323 | 0.1 | 0.05 | 101 | <0.024 | 1.00 | <0.11 |
| Well 6 | 307 | 0.1 | 0.11 | 82.8 | 0.038 | 1.23 | <0.11 |
| Well 7 | 231 | 0.1 | 0.10 | 63.1 | 0.076 | 1.61 | <0.11 |
| Well 8 | 370 | 0.3 | 0.13 | 81.2 | <0.024 | 1.10 | <0.11 |
| Well 9 | 258 | <0.1 | 0.03 | 86.1 | 0.092 | 0.92 | <0.11 |
| Well 10 | 256 | 0.4 | 0.24 | 94.6 | 0.168 | 1.06 | <0.11 |
| G-well | 439 | 5.9 | 0.008 | 131 | 0.024 | 1.88 | <0.11 |
|  |  |  |  |  |  |  |  |
| Site no. | Mg (mg/L) | Mn (mg/L) | Mo (mg/L) | Na (mg/L) | P (mg/L) | Pb (mg/L) | Sb (mg/L) |
| Well 1 | 36.9 | 0.01 | <0.022 | 4.52 | 0.100 | <0.041 | <0.059 |
| Well 2 | 45.3 | 0.00 | <0.022 | 5.81 | 0.100 | <0.041 | <0.059 |
| Well 3 | 45.5 | <0.0015 | <0.022 | 4.62 | 0.100 | <0.041 | <0.059 |
| Well 4 | 50.8 | <0.0015 | <0.022 | 3.22 | <0.073 | <0.041 | <0.059 |
| Well 5 | 54.4 | 0.01 | <0.022 | 5.64 | <0.073 | <0.041 | <0.059 |
| Well 6 | 45.1 | 0.00 | <0.022 | 3.53 | <0.073 | <0.041 | <0.059 |
| Well 7 | 35.7 | 0.01 | <0.022 | 2.08 | 0.100 | <0.041 | <0.059 |
| Well 8 | 38.2 | 0.02 | <0.022 | 7.68 | 0.120 | <0.041 | <0.059 |
| Well 9 | 53.0 | 0.17 | <0.022 | 5.74 | 0.120 | <0.041 | <0.059 |
| Well 10 | 48.9 | 0.02 | <0.022 | 10.3 | <0.073 | <0.041 | <0.059 |
| G-well | 70.1 | 0.00 | <0.022 | 53.4 | <0.073 | <0.041 | <0.059 |
|  |  |  |  |  |  |  |  |
| Site no. | Se (mg/L) | Si (mg/L) | Sn (mg/L) | Sr (mg/L) | Zn (mg/L) | Alkalinity (mg/L as CaCO3) | F (mg/L) |
| Well 1 | <0.13 | 6.00 | <0.086 | 0.086 | 0.0490 | 322 | 0.294 |
| Well 2 | <0.13 | 5.79 | <0.086 | 0.010 | 0.0330 | 350 | 0.116 |
| Well 3 | <0.13 | 5.68 | <0.086 | 0.002 | 0.0390 | 334 | 0.088 |
| Well 4 | <0.13 | 6.49 | <0.086 | 0.013 | <0.0097 | 371 | 0.139 |
| Well 5 | <0.13 | 8.07 | <0.086 | 0.054 | 0.0810 | 391 | 0.210 |
| Well 6 | <0.13 | 6.30 | <0.086 | 0.048 | 0.0290 | 346 | 0.188 |
| Well 7 | <0.13 | 4.51 | <0.086 | 0.054 | <0.0097 | 282 | 0.217 |
| Well 8 | <0.13 | 6.40 | <0.086 | 0.046 | 0.1700 | 315 | 0.236 |
| Well 9 | <0.13 | 7.35 | <0.086 | 0.031 | 0.0190 | 381 | 0.158 |
| Well 10 | <0.13 | 8.23 | <0.086 | 0.065 | 0.1180 | 354 | 0.177 |
| G-well | <0.13 | 10.3 | <0.086 | 0.181 | 0.0270 | 407 | 0.140 |
|  |  |  |  |  |  |  |  |
| Site no. | Cl (mg/L) | Br (mg/L) | NO3-N (mg/L) | SO4 (mg/L) | o-PO4-P (mg/L) | NVOC  (mg/L) | TKN  (mg/L) |
| Well 1 | 0.68 | <0.08 | <0.04 | 7.79 | 0.012 | 0.320 | <0.16 |
| Well 2 | 8.65 | <0.08 | 0.43 | 31.0 | 0.012 | 0.515 | <0.16 |
| Well 3 | 10.9 | <0.08 | 3.07 | 22.4 | 0.018 | 0.397 | <0.16 |
| Well 4 | 6.55 | <0.08 | 1.89 | 17.0 | 0.013 | 0.333 | <0.16 |
| Well 5 | 18.6 | <0.08 | <0.04 | 51.3 | 0.017 | <0.310 | <0.16 |
| Well 6 | 5.66 | <0.08 | <0.04 | 33.1 | 0.013 | <0.310 | <0.16 |
| Well 7 | 1.14 | <0.08 | <0.04 | 16.3 | 0.010 | 0.386 | <0.16 |
| Well 8 | 17.4 | <0.08 | <0.04 | 37.3 | 0.012 | 0.483 | <0.16 |
| Well 9 | 9.02 | <0.08 | 0.19 | 42.1 | 0.015 | <0.310 | <0.16 |
| Well 10 | 29.7 | <0.08 | <0.04 | 49.3 | 0.017 | 0.453 | <0.16 |
| G-well | 110 | <0.08 | 5.42 | 104 | <0.073 | ND | ND |
|  |  |  |  |  |  |  |  |
| Site no. | NH3-N (mg/L) | Total coliforms | *E. coli* | δDH2O (‰) | δ18OH2O (‰) | Tritium (TU) |  |
| Well 1 | 0.06 | Present | Absent | −48.2 | −7.63 | 0.60 |  |
| Well 2 | <0.03 | Present | Absent | −56.3 | −8.61 | 3.25 |  |
| Well 3 | <0.03 | Absent | Absent | −54.2 | −8.39 | 5.45 |  |
| Well 4 | <0.03 | Absent | Absent | −53.3 | −8.24 | 4.11 |  |
| Well 5 | <0.03 | Absent | Absent | −53.7 | −8.33 | 4.34 |  |
| Well 6 | <0.03 | Present | Absent | −52.7 | −8.23 | 1.71 |  |
| Well 7 | <0.03 | Absent | Absent | −56.4 | −8.45 | 0.60 |  |
| Well 8 | <0.03 | Absent | Absent | −54.6 | −8.38 | 2.28 |  |
| Well 9 | <0.03 | Absent | Absent | −56.0 | −8.62 | 3.41 |  |
| Well 10 | <0.03 | Absent | Absent | −54.5 | −8.52 | 3.42 |  |
| G-well | ND | Absent | Absent | −53.5 | −8.02 | 4.92 |  |

Table E-3. Water quality data from packer tests in the *Limback Well* from Viscocky et al. (1985).

| Ions (mg/L) | Galena-Platteville/Ancell | Prairie du Chien/Franconia | Ironton-Galesville | Elmhurst/Mount Simon |
| --- | --- | --- | --- | --- |
| Ca | 59 | 55 | 49 | 50 |
| Mg | 30 | 29 | 27 | 26 |
| Na | 1.8 | 1.7 | 1.3 | 1.3 |
| K | 2.3 | 2.7 | 2.5 | 2.8 |
| Cl- | 1.8 | 1.3 | 3.2 | 1.3 |
| SO4 | 21 | 8.4 | 8.7 | 5.9 |
| Alkalinity | 280 | 270 | 240 | 230 |
| TDS | 294 | 269 | 245 | 235 |


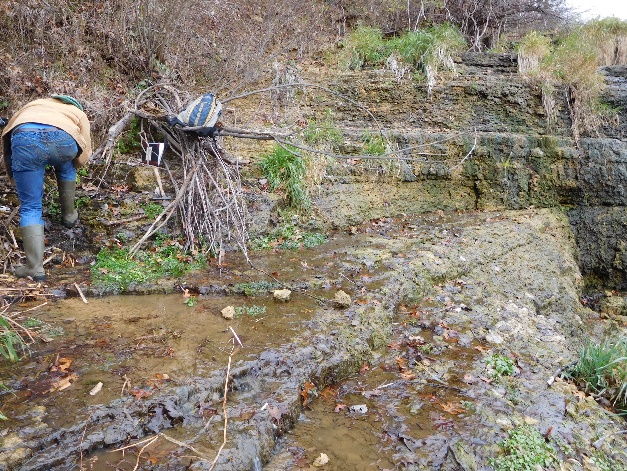

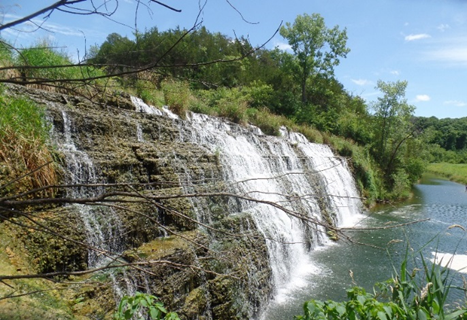


Figure E-1. Spillway Spring (40), a bedding-plane seep (left) located on a ledge just west of the spillway (right) and about 3 meters below the surface of Lake Galena. Photographs by S.V. Panno, used with permission.


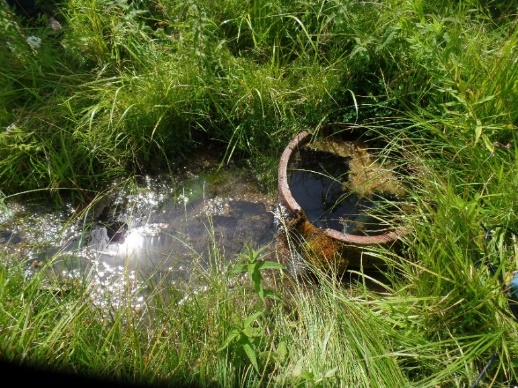

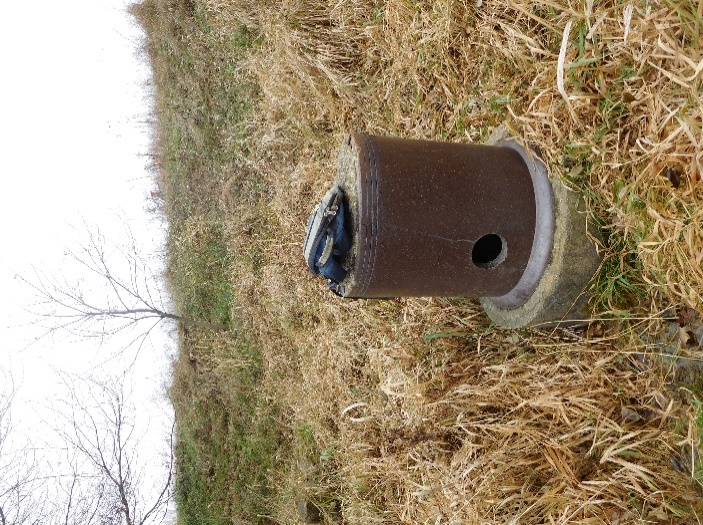

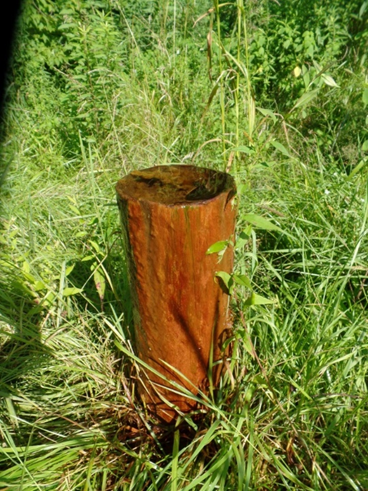


Figure E-2. Groundwater flowing from makeshift ceramic tiles/housings and a metal standpipe are examples of abandoned wells drilled during the days of lead-zinc mining in northwestern Illinois. From left to right, Weis Spring (41), Hicks Spring, and Ehler Spring (43). Photographs by S.V. Panno, used with permission.


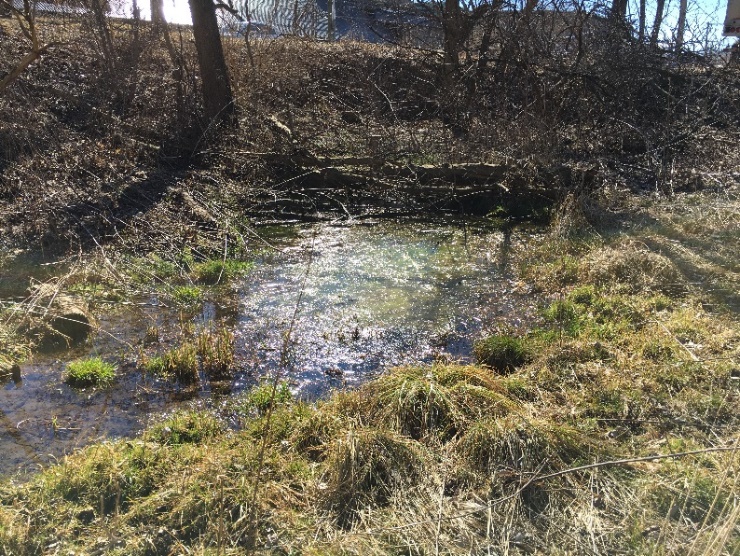

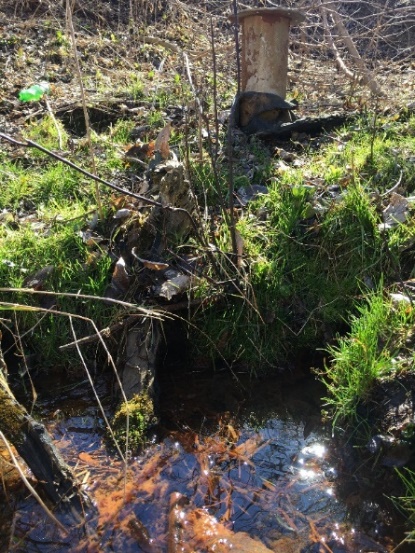


Figure E-3. Westwick Foundry Spring (42) is located in Galena, IL just across the road from the foundry for which it was named (left). The spring discharges just below a plugged, metal standpipe containing stagnant water (right). The area and well (as seen in the photograph on the left) has since been bulldozed, perhaps as an attempt to remediate the site, leaving little trace of the well. However, water from the well is still discharging from the site. Photographs by B. Baranski and used with permission.
